# Supplementary material for: Structural basis of terephthalate recognition by solute binding protein TphC
Source: PubMed Central journal article supplement (PMC8556258; doi:10.1038/s41467-021-26508-0), 2021-10-29
Supplement: 41467_2021_26508_MOESM2_ESM.pdf [file 41467_2021_26508_MOESM2_ESM.pdf]

### **Description of Additional Supplementary Files**

File Name: Supplementary Data 1

Description: Phylogenetic and genomic context analysis of tph proteins and operons ( A) Taxonomic information of the TphC homologues. (B) TphC homologues sequence analysis. (C) TphC homologues sequence analysis for SBP belonging to tph-like operons. (D) Genomic context analysis – sequences flanking (+/-7000 nts) the TphC homolog. (E) Percent Identity Matrix of proteins belonging to tph-like operons
